# Supplementary material for: Lattice constriction and trapped excitons: a structure–property relationship unveiled in CsPbBr3 perovskite QDs
Source: Royal Society of Chemistry journal article supplement (doi:10.1039/d0tc04120c), 2020-01-01
Supplement: d0tc04120c1.pdf [file d0tc04120c1.pdf]

Supporting Information

**Lattice constriction and trapped excitons: a structure-property relationship unveiled in  
CsPbBr<sub>3</sub> QDs**

Vishaka V Halali, Jesna K George, Altaf Pasha, Sarina K, R Geetha Balakrishna\*

*Centre for Nano and Material Sciences, Jain University, Ramanagaram, Bangalore 562112, India*

*Corresponding Author\**: [br.geetha@jainuniversity.ac.in](mailto:br.geetha@jainuniversity.ac.in)

## 1. Materials and Methods

Lead (II) Bromide ( $\text{PbBr}_2$ , 99%), cesium carbonate ( $\text{Cs}_2\text{CO}_3$ , 99.9%), oleic acid (OA, 99%), oleyl amine (OAM, 70%), 1-octadecene (ODE, 90%) and lanthanum (III) bromide ( $\text{LaBr}_3$ ) were purchased from Sigma Aldrich. DI  $\text{H}_2\text{O}$  and all other chemicals were of analytical standards used without purification. For transmission electron microscopy (TEM), the  $\text{CsPbBr}_3$  PQD's dropped cast onto copper grids with carbon support by slowly evaporating at room temperature. Transmission Electron Microscope (TEM) image and energy dispersive spectrometer (EDS) spectra were recorded using (Titan Themis 300kV from FEI, now Thermo). Attenuated total reflectance infrared (ATR-IR) spectra were recorded with a Bruker Alpha Eco-ATR spectrometer in the scan range of  $4000\text{-}500\text{cm}^{-1}$  for the entire sample. UV-Vis absorption and PL spectra were recorded by Shimadzu UV-1800 spectrophotometer using a 10 mm quartz cuvette and Shimadzu RF 5301PC Spectro fluorophotometer respectively. X-ray diffraction patterns were recorded on an Ultima-IV X-ray diffraction (Rigaku Corporation, Japan) using Ni-filtered  $\text{Cu K}\alpha$  radiation with a  $2\theta$  scan speed of  $2.0^\circ \text{min}^{-1}$  and a  $2\theta$  scan range of  $5\text{-}80^\circ$  at 40KV and 30Ma. X-ray photoelectron spectra were recorded using multi-technique X-ray photoelectron spectroscopy with XPS-mapping capability AXIS ULTRA 165. Time Resolved Fluorescence Spectrometer (TRPL), Horiba Jobin Yvon Fluorocube-01-NL Fluorescence Life time System determined the fluorescence life Time.

## 2. Synthesis of $\text{CsPbBr}_3$ perovskite QDs

All- Inorganics  $\text{CsPbBr}_3$  perovskite QD's were synthesized through the hot-injection method by the following steps as reported in our previous literature [1].

## 3. Preparation of $\text{La}^{3+}$ metal ion solution

The stock solution ( $3 \mu\text{M}$ ) was prepared by dissolving 0.1 mM of Lanthanum bromide in 0.5 ml ethyl acetate followed by ultrasonic treatment for 10 min to obtain a transparent solution. It was then made upto 10mL.

## 4. Doping of $\text{La}^{3+}$ into $\text{CsPbBr}_3$

The synthesized  $\text{CsPbBr}_3$  perovskite QDs (0.3 mg) dispersed in 2 ml toluene were mixed with  $2\mu\text{L}$  of  $0.4 \mu\text{M}$  lanthanum ions (in toluene) and made up to 5 mL. The mixture was then loaded into the cuvette and characterized after shaking for 60 seconds to ensure complete reaction between the perovskite QDs and the enhancer ( $\text{La}^{3+}$  ions).

## 5. Structural and optical properties for the CsPbBr<sub>3</sub> perovskite QDs

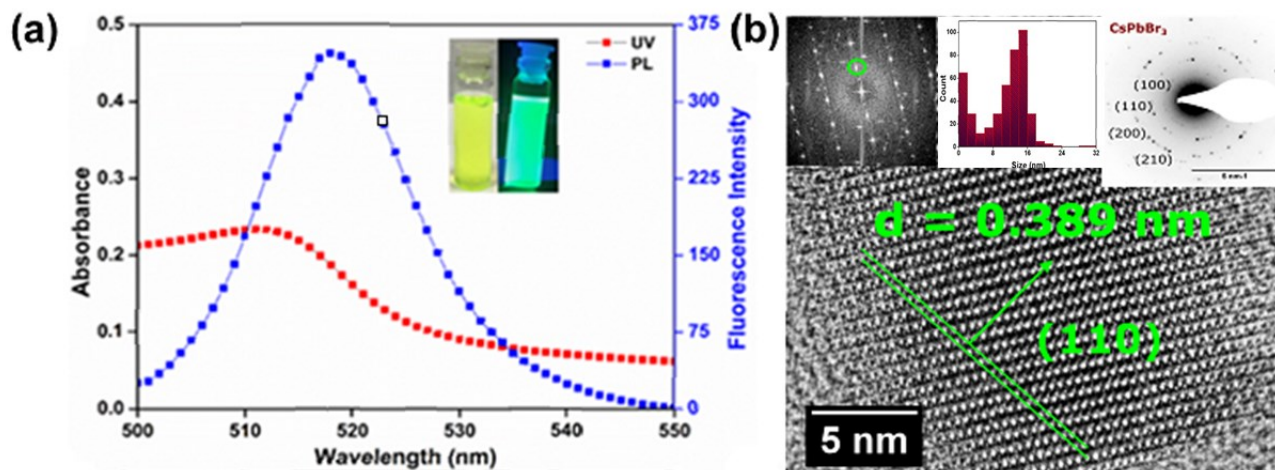

**Fig. S1(a) Absorption and emission spectra of CsPbBr<sub>3</sub> perovskite QDs dispersed in toluene; (b) HRTEM image inset: particle size distribution, SAED pattern**

The CsPbBr<sub>3</sub> perovskite QDs were synthesized in the presence of OAM and OA as co-solvent via previously reported procedure. From Fig. S1(a) it could be seen that CsPbBr<sub>3</sub> PQDs have an obvious absorption peak at 508 nm and an intense emission peak at 518 nm. By varying the excitation wavelength from 370 to 460 nm, there is no change in the emission wavelength and PL intensity of CsPbBr<sub>3</sub> perovskite QDs, an indication of their independence property of emission wavelength on the excitation energy (Fig. S1(a)). Transmission electron microscopy (TEM) image of the as-prepared CsPbBr<sub>3</sub> perovskite QDs was measured in Fig. S1(b) from which it could be seen that the CsPbBr<sub>3</sub> perovskite QDs arranged orderly without any aggregation presented a cubic phase with a uniform average edge. The high-resolution TEM (HRTEM) image in inset of Fig. S1(b) reveals the well-resolved lattice fringes with the interplanar distance about 3.89 Å, which coincides with the (110) plane and demonstrates the high crystalline nature of the QDs. Inset of Fig. S1(b) also show cube shaped particles with an average particle size of 16 -19 nm. In our study, the XRD pattern of the CsPbBr<sub>3</sub> QDs in Fig. S2 indicates the perovskite phase of CsPbBr<sub>3</sub> (JCPDS No. 96-153-3063). The Cs: Pb: Br atom ratio of the CsPbBr<sub>3</sub> PQDs measured by the energy-dispersive spectrometer (EDS) is consistent with the stoichiometry of 1:1:3 Fig. S4.

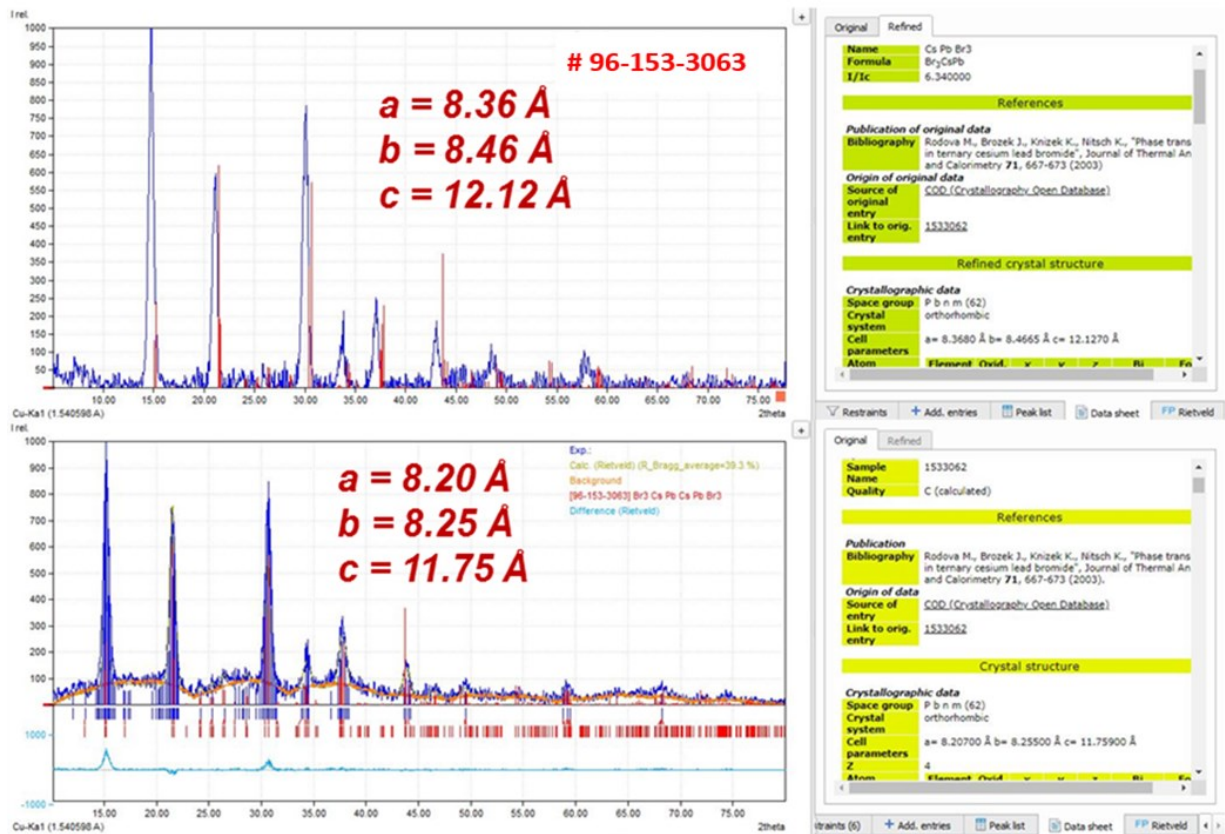

Fig. S2 XRD reitveld refinement graphs of CsPbBr<sub>3</sub> perovskite QDs and CsPbBr<sub>3</sub>-La<sup>3+</sup> perovskite QDs

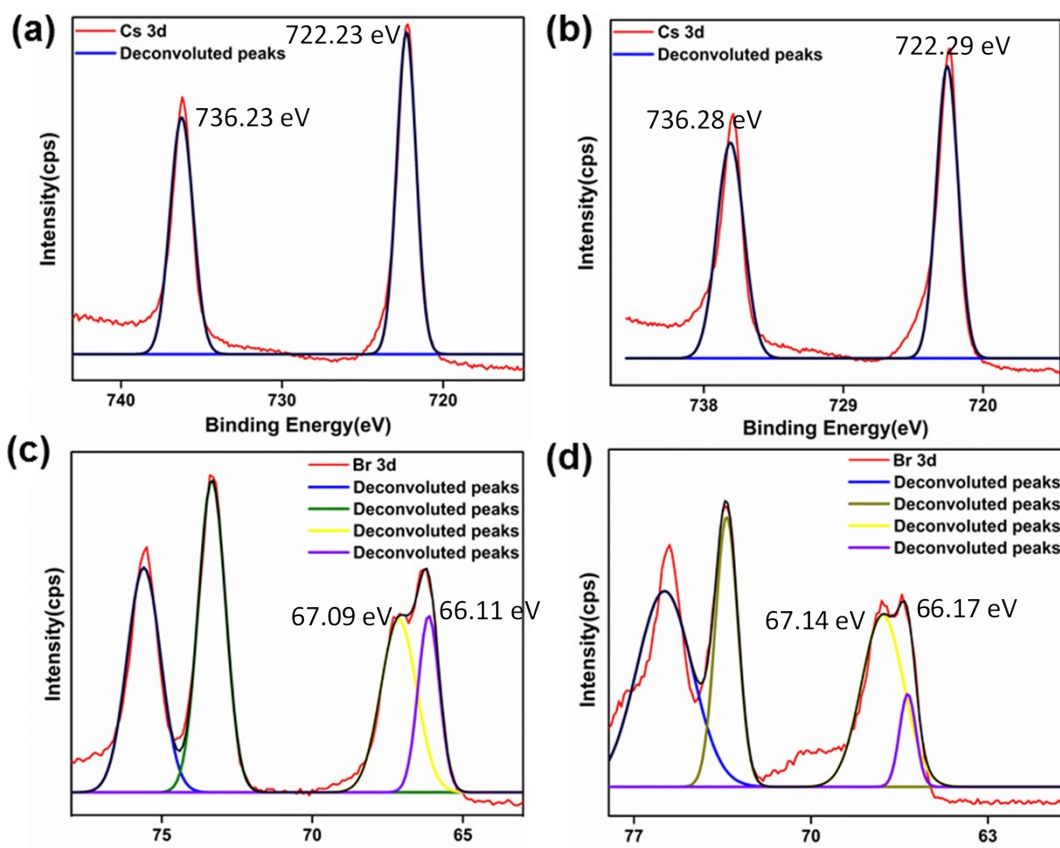

**Fig S3 High-resolution XPS spectra corresponding to Cs 3d and Br 3d of CsPbBr<sub>3</sub> and CsPbBr<sub>3</sub>-La<sup>3+</sup> perovskite QDs**

### CsPbBr<sub>3</sub> perovskite QDs

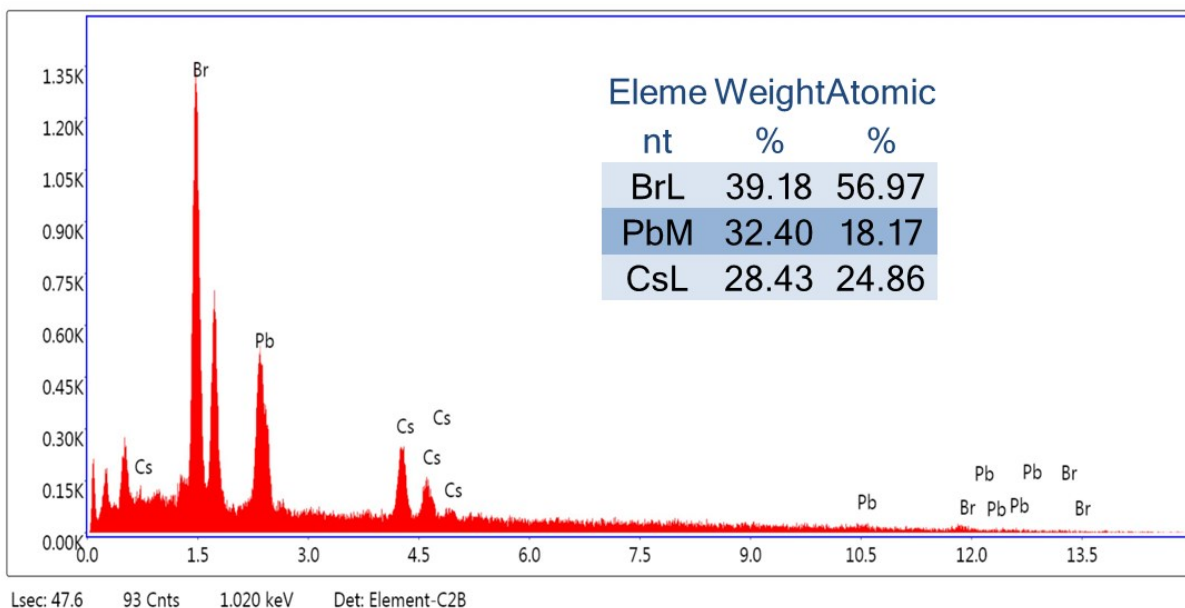

### CsPbBr<sub>3</sub>-La<sup>3+</sup> perovskite QDs

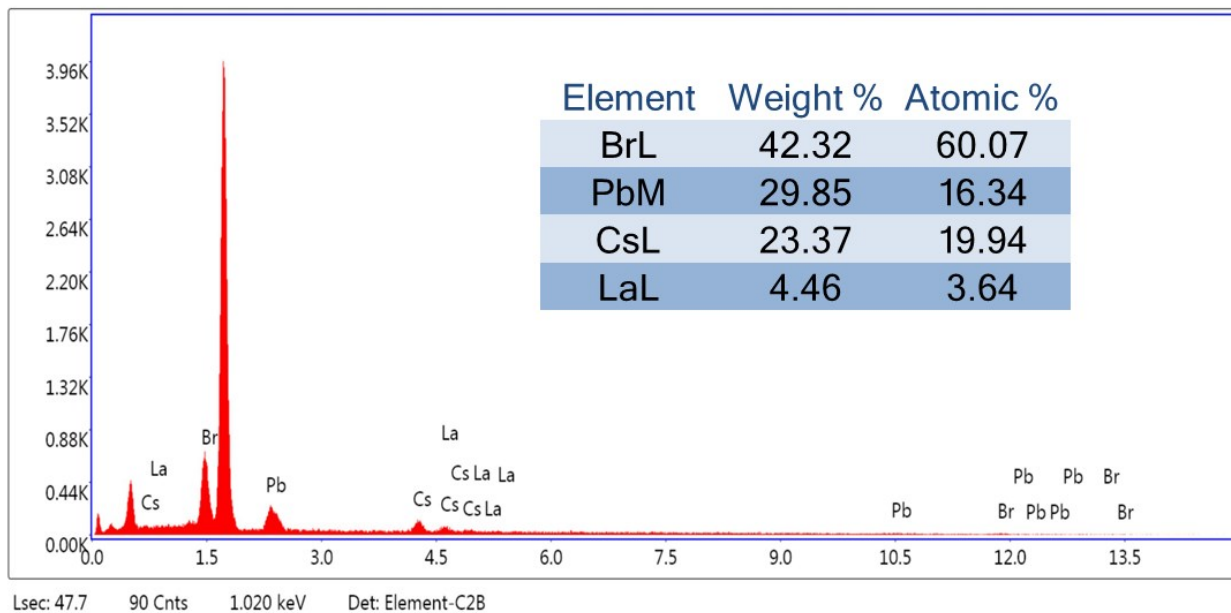

**Fig. S4 EDS spectrum and Quantification of elemental composition in CsPbBr<sub>3</sub> and CsPbBr<sub>3</sub>-La<sup>3+</sup> perovskite QDs.**

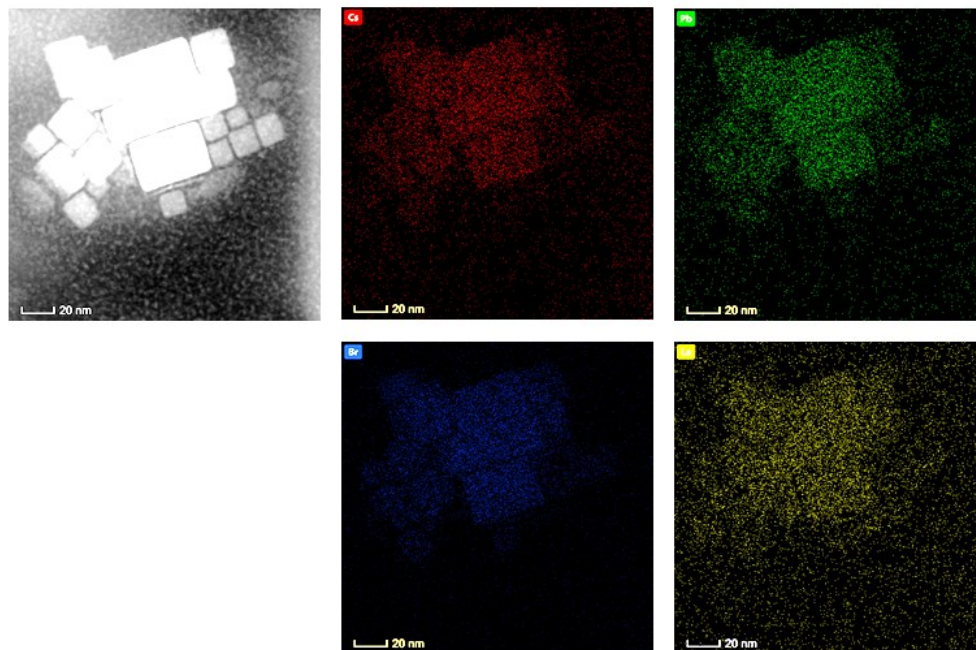

**Fig. S5 Elemental mapping of Cs, Pb, Br and La ions**



(a) CsPbBr<sub>3</sub> perovskite QDs

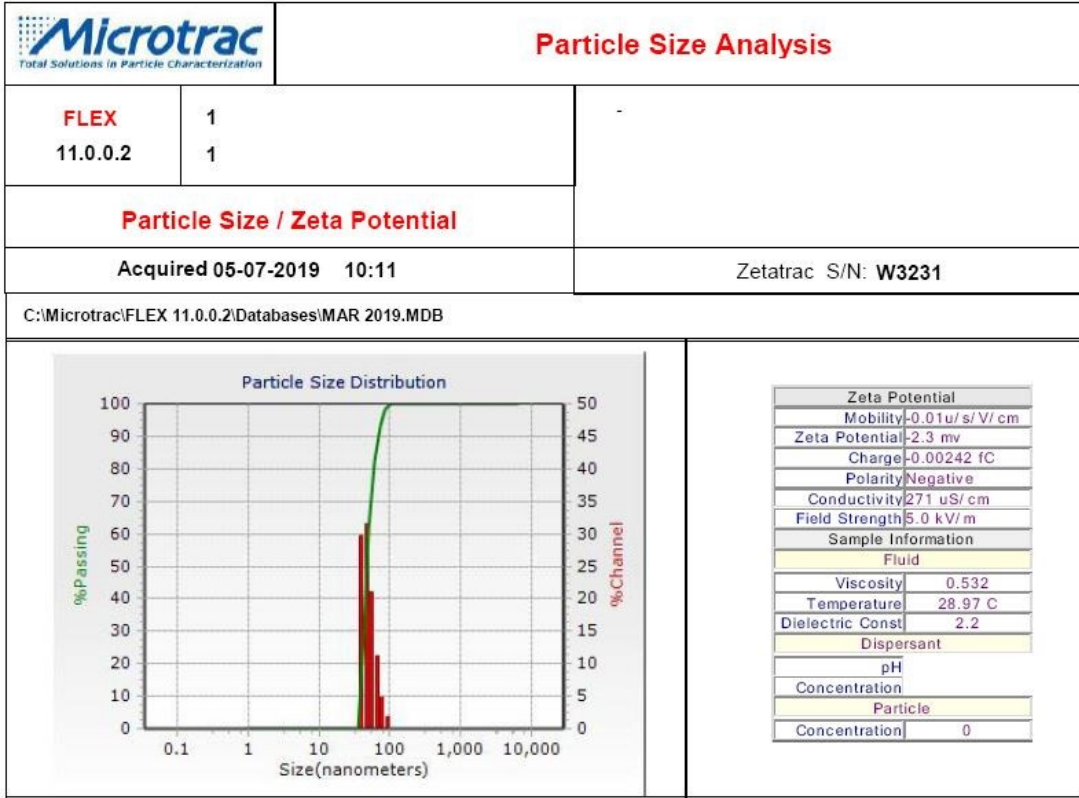



| - Particle Size Summary -                                                                                                                                                                                                                                                                                                                                                                                                                                                                                                               |            | - Measurement Information - |  |      |         |         |       |         |       |         |                                                                                                                                                                                                                                                                                                                                                                                                                                                                                                                                                                                                                                                                                                                                                                                                                                                                                                                                                                                                                                                                                                                                                                          |     |       |     |                        |      |             |     |       |     |       |      |                 |     |            |                                                                                                                                                                                                                                                                                                                                                                                                                                                                                                                                                   |      |             |      |       |               |            |               |       |               |       |                 |       |                |       |                |       |               |       |             |        |              |        |               |       |               |        |                    |      |                      |  |                          |  |
|-----------------------------------------------------------------------------------------------------------------------------------------------------------------------------------------------------------------------------------------------------------------------------------------------------------------------------------------------------------------------------------------------------------------------------------------------------------------------------------------------------------------------------------------|------------|-----------------------------|--|------|---------|---------|-------|---------|-------|---------|--------------------------------------------------------------------------------------------------------------------------------------------------------------------------------------------------------------------------------------------------------------------------------------------------------------------------------------------------------------------------------------------------------------------------------------------------------------------------------------------------------------------------------------------------------------------------------------------------------------------------------------------------------------------------------------------------------------------------------------------------------------------------------------------------------------------------------------------------------------------------------------------------------------------------------------------------------------------------------------------------------------------------------------------------------------------------------------------------------------------------------------------------------------------------|-----|-------|-----|------------------------|------|-------------|-----|-------|-----|-------|------|-----------------|-----|------------|---------------------------------------------------------------------------------------------------------------------------------------------------------------------------------------------------------------------------------------------------------------------------------------------------------------------------------------------------------------------------------------------------------------------------------------------------------------------------------------------------------------------------------------------------|------|-------------|------|-------|---------------|------------|---------------|-------|---------------|-------|-----------------|-------|----------------|-------|----------------|-------|---------------|-------|-------------|--------|--------------|--------|---------------|-------|---------------|--------|--------------------|------|----------------------|--|--------------------------|--|
| <table border="1"> <thead> <tr> <th colspan="2">Summary</th> </tr> <tr> <th>Data</th> <th>Value</th> </tr> </thead> <tbody> <tr><td>MV(nm):</td><td>4,990</td></tr> <tr><td>MN(nm):</td><td>52.10</td></tr> <tr><td>MA(nm):</td><td>2,265</td></tr> <tr><td>CS:</td><td>2.649</td></tr> <tr><td>SD:</td><td>11.02</td></tr> <tr><td>PDI:</td><td>623.7</td></tr> <tr><td>Mz:</td><td>4,922</td></tr> <tr><td>si:</td><td>1,509</td></tr> <tr><td>Ski:</td><td>678.61727</td></tr> <tr><td>Kg:</td><td>979.4</td></tr> </tbody> </table> |            | Summary                     |  | Data | Value   | MV(nm): | 4,990 | MN(nm): | 52.10 | MA(nm): | 2,265                                                                                                                                                                                                                                                                                                                                                                                                                                                                                                                                                                                                                                                                                                                                                                                                                                                                                                                                                                                                                                                                                                                                                                    | CS: | 2.649 | SD: | 11.02                  | PDI: | 623.7       | Mz: | 4,922 | si: | 1,509 | Ski: | 678.61727       | Kg: | 979.4      | <table border="1"> <thead> <tr> <th colspan="2">Percentiles</th> </tr> <tr> <th>%Tile</th> <th>Size(nm)</th> </tr> </thead> <tbody> <tr><td>10.00</td><td>38.90</td></tr> <tr><td>20.00</td><td>40.90</td></tr> <tr><td>30.00</td><td>43.10</td></tr> <tr><td>40.00</td><td>45.40</td></tr> <tr><td>50.00</td><td>47.90</td></tr> <tr><td>60.00</td><td>50.70</td></tr> <tr><td>70.00</td><td>54.40</td></tr> <tr><td>80.00</td><td>59.50</td></tr> <tr><td>90.00</td><td>67.70</td></tr> <tr><td>95.00</td><td>75.70</td></tr> </tbody> </table> |      | Percentiles |      | %Tile | Size(nm)      | 10.00      | 38.90         | 20.00 | 40.90         | 30.00 | 43.10           | 40.00 | 45.40          | 50.00 | 47.90          | 60.00 | 50.70         | 70.00 | 54.40       | 80.00  | 59.50        | 90.00  | 67.70         | 95.00 | 75.70         |        |                    |      |                      |  |                          |  |
| Summary                                                                                                                                                                                                                                                                                                                                                                                                                                                                                                                                 |            |                             |  |      |         |         |       |         |       |         |                                                                                                                                                                                                                                                                                                                                                                                                                                                                                                                                                                                                                                                                                                                                                                                                                                                                                                                                                                                                                                                                                                                                                                          |     |       |     |                        |      |             |     |       |     |       |      |                 |     |            |                                                                                                                                                                                                                                                                                                                                                                                                                                                                                                                                                   |      |             |      |       |               |            |               |       |               |       |                 |       |                |       |                |       |               |       |             |        |              |        |               |       |               |        |                    |      |                      |  |                          |  |
| Data                                                                                                                                                                                                                                                                                                                                                                                                                                                                                                                                    | Value      |                             |  |      |         |         |       |         |       |         |                                                                                                                                                                                                                                                                                                                                                                                                                                                                                                                                                                                                                                                                                                                                                                                                                                                                                                                                                                                                                                                                                                                                                                          |     |       |     |                        |      |             |     |       |     |       |      |                 |     |            |                                                                                                                                                                                                                                                                                                                                                                                                                                                                                                                                                   |      |             |      |       |               |            |               |       |               |       |                 |       |                |       |                |       |               |       |             |        |              |        |               |       |               |        |                    |      |                      |  |                          |  |
| MV(nm):                                                                                                                                                                                                                                                                                                                                                                                                                                                                                                                                 | 4,990      |                             |  |      |         |         |       |         |       |         |                                                                                                                                                                                                                                                                                                                                                                                                                                                                                                                                                                                                                                                                                                                                                                                                                                                                                                                                                                                                                                                                                                                                                                          |     |       |     |                        |      |             |     |       |     |       |      |                 |     |            |                                                                                                                                                                                                                                                                                                                                                                                                                                                                                                                                                   |      |             |      |       |               |            |               |       |               |       |                 |       |                |       |                |       |               |       |             |        |              |        |               |       |               |        |                    |      |                      |  |                          |  |
| MN(nm):                                                                                                                                                                                                                                                                                                                                                                                                                                                                                                                                 | 52.10      |                             |  |      |         |         |       |         |       |         |                                                                                                                                                                                                                                                                                                                                                                                                                                                                                                                                                                                                                                                                                                                                                                                                                                                                                                                                                                                                                                                                                                                                                                          |     |       |     |                        |      |             |     |       |     |       |      |                 |     |            |                                                                                                                                                                                                                                                                                                                                                                                                                                                                                                                                                   |      |             |      |       |               |            |               |       |               |       |                 |       |                |       |                |       |               |       |             |        |              |        |               |       |               |        |                    |      |                      |  |                          |  |
| MA(nm):                                                                                                                                                                                                                                                                                                                                                                                                                                                                                                                                 | 2,265      |                             |  |      |         |         |       |         |       |         |                                                                                                                                                                                                                                                                                                                                                                                                                                                                                                                                                                                                                                                                                                                                                                                                                                                                                                                                                                                                                                                                                                                                                                          |     |       |     |                        |      |             |     |       |     |       |      |                 |     |            |                                                                                                                                                                                                                                                                                                                                                                                                                                                                                                                                                   |      |             |      |       |               |            |               |       |               |       |                 |       |                |       |                |       |               |       |             |        |              |        |               |       |               |        |                    |      |                      |  |                          |  |
| CS:                                                                                                                                                                                                                                                                                                                                                                                                                                                                                                                                     | 2.649      |                             |  |      |         |         |       |         |       |         |                                                                                                                                                                                                                                                                                                                                                                                                                                                                                                                                                                                                                                                                                                                                                                                                                                                                                                                                                                                                                                                                                                                                                                          |     |       |     |                        |      |             |     |       |     |       |      |                 |     |            |                                                                                                                                                                                                                                                                                                                                                                                                                                                                                                                                                   |      |             |      |       |               |            |               |       |               |       |                 |       |                |       |                |       |               |       |             |        |              |        |               |       |               |        |                    |      |                      |  |                          |  |
| SD:                                                                                                                                                                                                                                                                                                                                                                                                                                                                                                                                     | 11.02      |                             |  |      |         |         |       |         |       |         |                                                                                                                                                                                                                                                                                                                                                                                                                                                                                                                                                                                                                                                                                                                                                                                                                                                                                                                                                                                                                                                                                                                                                                          |     |       |     |                        |      |             |     |       |     |       |      |                 |     |            |                                                                                                                                                                                                                                                                                                                                                                                                                                                                                                                                                   |      |             |      |       |               |            |               |       |               |       |                 |       |                |       |                |       |               |       |             |        |              |        |               |       |               |        |                    |      |                      |  |                          |  |
| PDI:                                                                                                                                                                                                                                                                                                                                                                                                                                                                                                                                    | 623.7      |                             |  |      |         |         |       |         |       |         |                                                                                                                                                                                                                                                                                                                                                                                                                                                                                                                                                                                                                                                                                                                                                                                                                                                                                                                                                                                                                                                                                                                                                                          |     |       |     |                        |      |             |     |       |     |       |      |                 |     |            |                                                                                                                                                                                                                                                                                                                                                                                                                                                                                                                                                   |      |             |      |       |               |            |               |       |               |       |                 |       |                |       |                |       |               |       |             |        |              |        |               |       |               |        |                    |      |                      |  |                          |  |
| Mz:                                                                                                                                                                                                                                                                                                                                                                                                                                                                                                                                     | 4,922      |                             |  |      |         |         |       |         |       |         |                                                                                                                                                                                                                                                                                                                                                                                                                                                                                                                                                                                                                                                                                                                                                                                                                                                                                                                                                                                                                                                                                                                                                                          |     |       |     |                        |      |             |     |       |     |       |      |                 |     |            |                                                                                                                                                                                                                                                                                                                                                                                                                                                                                                                                                   |      |             |      |       |               |            |               |       |               |       |                 |       |                |       |                |       |               |       |             |        |              |        |               |       |               |        |                    |      |                      |  |                          |  |
| si:                                                                                                                                                                                                                                                                                                                                                                                                                                                                                                                                     | 1,509      |                             |  |      |         |         |       |         |       |         |                                                                                                                                                                                                                                                                                                                                                                                                                                                                                                                                                                                                                                                                                                                                                                                                                                                                                                                                                                                                                                                                                                                                                                          |     |       |     |                        |      |             |     |       |     |       |      |                 |     |            |                                                                                                                                                                                                                                                                                                                                                                                                                                                                                                                                                   |      |             |      |       |               |            |               |       |               |       |                 |       |                |       |                |       |               |       |             |        |              |        |               |       |               |        |                    |      |                      |  |                          |  |
| Ski:                                                                                                                                                                                                                                                                                                                                                                                                                                                                                                                                    | 678.61727  |                             |  |      |         |         |       |         |       |         |                                                                                                                                                                                                                                                                                                                                                                                                                                                                                                                                                                                                                                                                                                                                                                                                                                                                                                                                                                                                                                                                                                                                                                          |     |       |     |                        |      |             |     |       |     |       |      |                 |     |            |                                                                                                                                                                                                                                                                                                                                                                                                                                                                                                                                                   |      |             |      |       |               |            |               |       |               |       |                 |       |                |       |                |       |               |       |             |        |              |        |               |       |               |        |                    |      |                      |  |                          |  |
| Kg:                                                                                                                                                                                                                                                                                                                                                                                                                                                                                                                                     | 979.4      |                             |  |      |         |         |       |         |       |         |                                                                                                                                                                                                                                                                                                                                                                                                                                                                                                                                                                                                                                                                                                                                                                                                                                                                                                                                                                                                                                                                                                                                                                          |     |       |     |                        |      |             |     |       |     |       |      |                 |     |            |                                                                                                                                                                                                                                                                                                                                                                                                                                                                                                                                                   |      |             |      |       |               |            |               |       |               |       |                 |       |                |       |                |       |               |       |             |        |              |        |               |       |               |        |                    |      |                      |  |                          |  |
| Percentiles                                                                                                                                                                                                                                                                                                                                                                                                                                                                                                                             |            |                             |  |      |         |         |       |         |       |         |                                                                                                                                                                                                                                                                                                                                                                                                                                                                                                                                                                                                                                                                                                                                                                                                                                                                                                                                                                                                                                                                                                                                                                          |     |       |     |                        |      |             |     |       |     |       |      |                 |     |            |                                                                                                                                                                                                                                                                                                                                                                                                                                                                                                                                                   |      |             |      |       |               |            |               |       |               |       |                 |       |                |       |                |       |               |       |             |        |              |        |               |       |               |        |                    |      |                      |  |                          |  |
| %Tile                                                                                                                                                                                                                                                                                                                                                                                                                                                                                                                                   | Size(nm)   |                             |  |      |         |         |       |         |       |         |                                                                                                                                                                                                                                                                                                                                                                                                                                                                                                                                                                                                                                                                                                                                                                                                                                                                                                                                                                                                                                                                                                                                                                          |     |       |     |                        |      |             |     |       |     |       |      |                 |     |            |                                                                                                                                                                                                                                                                                                                                                                                                                                                                                                                                                   |      |             |      |       |               |            |               |       |               |       |                 |       |                |       |                |       |               |       |             |        |              |        |               |       |               |        |                    |      |                      |  |                          |  |
| 10.00                                                                                                                                                                                                                                                                                                                                                                                                                                                                                                                                   | 38.90      |                             |  |      |         |         |       |         |       |         |                                                                                                                                                                                                                                                                                                                                                                                                                                                                                                                                                                                                                                                                                                                                                                                                                                                                                                                                                                                                                                                                                                                                                                          |     |       |     |                        |      |             |     |       |     |       |      |                 |     |            |                                                                                                                                                                                                                                                                                                                                                                                                                                                                                                                                                   |      |             |      |       |               |            |               |       |               |       |                 |       |                |       |                |       |               |       |             |        |              |        |               |       |               |        |                    |      |                      |  |                          |  |
| 20.00                                                                                                                                                                                                                                                                                                                                                                                                                                                                                                                                   | 40.90      |                             |  |      |         |         |       |         |       |         |                                                                                                                                                                                                                                                                                                                                                                                                                                                                                                                                                                                                                                                                                                                                                                                                                                                                                                                                                                                                                                                                                                                                                                          |     |       |     |                        |      |             |     |       |     |       |      |                 |     |            |                                                                                                                                                                                                                                                                                                                                                                                                                                                                                                                                                   |      |             |      |       |               |            |               |       |               |       |                 |       |                |       |                |       |               |       |             |        |              |        |               |       |               |        |                    |      |                      |  |                          |  |
| 30.00                                                                                                                                                                                                                                                                                                                                                                                                                                                                                                                                   | 43.10      |                             |  |      |         |         |       |         |       |         |                                                                                                                                                                                                                                                                                                                                                                                                                                                                                                                                                                                                                                                                                                                                                                                                                                                                                                                                                                                                                                                                                                                                                                          |     |       |     |                        |      |             |     |       |     |       |      |                 |     |            |                                                                                                                                                                                                                                                                                                                                                                                                                                                                                                                                                   |      |             |      |       |               |            |               |       |               |       |                 |       |                |       |                |       |               |       |             |        |              |        |               |       |               |        |                    |      |                      |  |                          |  |
| 40.00                                                                                                                                                                                                                                                                                                                                                                                                                                                                                                                                   | 45.40      |                             |  |      |         |         |       |         |       |         |                                                                                                                                                                                                                                                                                                                                                                                                                                                                                                                                                                                                                                                                                                                                                                                                                                                                                                                                                                                                                                                                                                                                                                          |     |       |     |                        |      |             |     |       |     |       |      |                 |     |            |                                                                                                                                                                                                                                                                                                                                                                                                                                                                                                                                                   |      |             |      |       |               |            |               |       |               |       |                 |       |                |       |                |       |               |       |             |        |              |        |               |       |               |        |                    |      |                      |  |                          |  |
| 50.00                                                                                                                                                                                                                                                                                                                                                                                                                                                                                                                                   | 47.90      |                             |  |      |         |         |       |         |       |         |                                                                                                                                                                                                                                                                                                                                                                                                                                                                                                                                                                                                                                                                                                                                                                                                                                                                                                                                                                                                                                                                                                                                                                          |     |       |     |                        |      |             |     |       |     |       |      |                 |     |            |                                                                                                                                                                                                                                                                                                                                                                                                                                                                                                                                                   |      |             |      |       |               |            |               |       |               |       |                 |       |                |       |                |       |               |       |             |        |              |        |               |       |               |        |                    |      |                      |  |                          |  |
| 60.00                                                                                                                                                                                                                                                                                                                                                                                                                                                                                                                                   | 50.70      |                             |  |      |         |         |       |         |       |         |                                                                                                                                                                                                                                                                                                                                                                                                                                                                                                                                                                                                                                                                                                                                                                                                                                                                                                                                                                                                                                                                                                                                                                          |     |       |     |                        |      |             |     |       |     |       |      |                 |     |            |                                                                                                                                                                                                                                                                                                                                                                                                                                                                                                                                                   |      |             |      |       |               |            |               |       |               |       |                 |       |                |       |                |       |               |       |             |        |              |        |               |       |               |        |                    |      |                      |  |                          |  |
| 70.00                                                                                                                                                                                                                                                                                                                                                                                                                                                                                                                                   | 54.40      |                             |  |      |         |         |       |         |       |         |                                                                                                                                                                                                                                                                                                                                                                                                                                                                                                                                                                                                                                                                                                                                                                                                                                                                                                                                                                                                                                                                                                                                                                          |     |       |     |                        |      |             |     |       |     |       |      |                 |     |            |                                                                                                                                                                                                                                                                                                                                                                                                                                                                                                                                                   |      |             |      |       |               |            |               |       |               |       |                 |       |                |       |                |       |               |       |             |        |              |        |               |       |               |        |                    |      |                      |  |                          |  |
| 80.00                                                                                                                                                                                                                                                                                                                                                                                                                                                                                                                                   | 59.50      |                             |  |      |         |         |       |         |       |         |                                                                                                                                                                                                                                                                                                                                                                                                                                                                                                                                                                                                                                                                                                                                                                                                                                                                                                                                                                                                                                                                                                                                                                          |     |       |     |                        |      |             |     |       |     |       |      |                 |     |            |                                                                                                                                                                                                                                                                                                                                                                                                                                                                                                                                                   |      |             |      |       |               |            |               |       |               |       |                 |       |                |       |                |       |               |       |             |        |              |        |               |       |               |        |                    |      |                      |  |                          |  |
| 90.00                                                                                                                                                                                                                                                                                                                                                                                                                                                                                                                                   | 67.70      |                             |  |      |         |         |       |         |       |         |                                                                                                                                                                                                                                                                                                                                                                                                                                                                                                                                                                                                                                                                                                                                                                                                                                                                                                                                                                                                                                                                                                                                                                          |     |       |     |                        |      |             |     |       |     |       |      |                 |     |            |                                                                                                                                                                                                                                                                                                                                                                                                                                                                                                                                                   |      |             |      |       |               |            |               |       |               |       |                 |       |                |       |                |       |               |       |             |        |              |        |               |       |               |        |                    |      |                      |  |                          |  |
| 95.00                                                                                                                                                                                                                                                                                                                                                                                                                                                                                                                                   | 75.70      |                             |  |      |         |         |       |         |       |         |                                                                                                                                                                                                                                                                                                                                                                                                                                                                                                                                                                                                                                                                                                                                                                                                                                                                                                                                                                                                                                                                                                                                                                          |     |       |     |                        |      |             |     |       |     |       |      |                 |     |            |                                                                                                                                                                                                                                                                                                                                                                                                                                                                                                                                                   |      |             |      |       |               |            |               |       |               |       |                 |       |                |       |                |       |               |       |             |        |              |        |               |       |               |        |                    |      |                      |  |                          |  |
| <table border="1"> <thead> <tr> <th colspan="3">Peaks Summary</th> </tr> <tr> <th>Dia(nm)</th> <th>Vol%</th> <th>Width</th> </tr> </thead> <tbody> <tr> <td>47.9</td> <td>100</td> <td>22.04</td> </tr> </tbody> </table>                                                                                                                                                                                                                                                                                                               |            | Peaks Summary               |  |      | Dia(nm) | Vol%    | Width | 47.9    | 100   | 22.04   | <table border="1"> <thead> <tr> <th colspan="2">Title</th> </tr> <tr> <td colspan="2">Particle Size Analysis</td> </tr> <tr> <th colspan="2">Identifiers</th> </tr> <tr> <td colspan="2">1</td> </tr> <tr> <td colspan="2">1</td> </tr> <tr> <td>Database Record</td> <td>52</td> </tr> <tr> <td>Run Number</td> <td>1 of 1</td> </tr> <tr> <td>Date</td> <td>05-07-2019</td> </tr> <tr> <td>Time</td> <td>10:11</td> </tr> <tr> <td>Acquired Date</td> <td>05-07-2019</td> </tr> <tr> <td>Acquired Time</td> <td>10:11</td> </tr> <tr> <td>Serial Number</td> <td>W3231</td> </tr> <tr> <th colspan="2">Calculated Data</th> </tr> <tr> <td>Above Residual</td> <td>0</td> </tr> <tr> <td>Below Residual</td> <td>0</td> </tr> <tr> <td>Loading Index</td> <td>0.846</td> </tr> <tr> <td>Conc. Index</td> <td>0.2701</td> </tr> <tr> <td>RMS Residual</td> <td>0.033%</td> </tr> <tr> <td>Cell Temp (C)</td> <td>28.97</td> </tr> <tr> <td>Viscosity(cp)</td> <td>0.5320</td> </tr> <tr> <td>Reflected Pwr (uW)</td> <td>1.02</td> </tr> <tr> <th colspan="2">Recalculation Status</th> </tr> <tr> <td colspan="2">Live-Meas : : Original :</td> </tr> </thead></table> |     | Title |     | Particle Size Analysis |      | Identifiers |     | 1     |     | 1     |      | Database Record | 52  | Run Number | 1 of 1                                                                                                                                                                                                                                                                                                                                                                                                                                                                                                                                            | Date | 05-07-2019  | Time | 10:11 | Acquired Date | 05-07-2019 | Acquired Time | 10:11 | Serial Number | W3231 | Calculated Data |       | Above Residual | 0     | Below Residual | 0     | Loading Index | 0.846 | Conc. Index | 0.2701 | RMS Residual | 0.033% | Cell Temp (C) | 28.97 | Viscosity(cp) | 0.5320 | Reflected Pwr (uW) | 1.02 | Recalculation Status |  | Live-Meas : : Original : |  |
| Peaks Summary                                                                                                                                                                                                                                                                                                                                                                                                                                                                                                                           |            |                             |  |      |         |         |       |         |       |         |                                                                                                                                                                                                                                                                                                                                                                                                                                                                                                                                                                                                                                                                                                                                                                                                                                                                                                                                                                                                                                                                                                                                                                          |     |       |     |                        |      |             |     |       |     |       |      |                 |     |            |                                                                                                                                                                                                                                                                                                                                                                                                                                                                                                                                                   |      |             |      |       |               |            |               |       |               |       |                 |       |                |       |                |       |               |       |             |        |              |        |               |       |               |        |                    |      |                      |  |                          |  |
| Dia(nm)                                                                                                                                                                                                                                                                                                                                                                                                                                                                                                                                 | Vol%       | Width                       |  |      |         |         |       |         |       |         |                                                                                                                                                                                                                                                                                                                                                                                                                                                                                                                                                                                                                                                                                                                                                                                                                                                                                                                                                                                                                                                                                                                                                                          |     |       |     |                        |      |             |     |       |     |       |      |                 |     |            |                                                                                                                                                                                                                                                                                                                                                                                                                                                                                                                                                   |      |             |      |       |               |            |               |       |               |       |                 |       |                |       |                |       |               |       |             |        |              |        |               |       |               |        |                    |      |                      |  |                          |  |
| 47.9                                                                                                                                                                                                                                                                                                                                                                                                                                                                                                                                    | 100        | 22.04                       |  |      |         |         |       |         |       |         |                                                                                                                                                                                                                                                                                                                                                                                                                                                                                                                                                                                                                                                                                                                                                                                                                                                                                                                                                                                                                                                                                                                                                                          |     |       |     |                        |      |             |     |       |     |       |      |                 |     |            |                                                                                                                                                                                                                                                                                                                                                                                                                                                                                                                                                   |      |             |      |       |               |            |               |       |               |       |                 |       |                |       |                |       |               |       |             |        |              |        |               |       |               |        |                    |      |                      |  |                          |  |
| Title                                                                                                                                                                                                                                                                                                                                                                                                                                                                                                                                   |            |                             |  |      |         |         |       |         |       |         |                                                                                                                                                                                                                                                                                                                                                                                                                                                                                                                                                                                                                                                                                                                                                                                                                                                                                                                                                                                                                                                                                                                                                                          |     |       |     |                        |      |             |     |       |     |       |      |                 |     |            |                                                                                                                                                                                                                                                                                                                                                                                                                                                                                                                                                   |      |             |      |       |               |            |               |       |               |       |                 |       |                |       |                |       |               |       |             |        |              |        |               |       |               |        |                    |      |                      |  |                          |  |
| Particle Size Analysis                                                                                                                                                                                                                                                                                                                                                                                                                                                                                                                  |            |                             |  |      |         |         |       |         |       |         |                                                                                                                                                                                                                                                                                                                                                                                                                                                                                                                                                                                                                                                                                                                                                                                                                                                                                                                                                                                                                                                                                                                                                                          |     |       |     |                        |      |             |     |       |     |       |      |                 |     |            |                                                                                                                                                                                                                                                                                                                                                                                                                                                                                                                                                   |      |             |      |       |               |            |               |       |               |       |                 |       |                |       |                |       |               |       |             |        |              |        |               |       |               |        |                    |      |                      |  |                          |  |
| Identifiers                                                                                                                                                                                                                                                                                                                                                                                                                                                                                                                             |            |                             |  |      |         |         |       |         |       |         |                                                                                                                                                                                                                                                                                                                                                                                                                                                                                                                                                                                                                                                                                                                                                                                                                                                                                                                                                                                                                                                                                                                                                                          |     |       |     |                        |      |             |     |       |     |       |      |                 |     |            |                                                                                                                                                                                                                                                                                                                                                                                                                                                                                                                                                   |      |             |      |       |               |            |               |       |               |       |                 |       |                |       |                |       |               |       |             |        |              |        |               |       |               |        |                    |      |                      |  |                          |  |
| 1                                                                                                                                                                                                                                                                                                                                                                                                                                                                                                                                       |            |                             |  |      |         |         |       |         |       |         |                                                                                                                                                                                                                                                                                                                                                                                                                                                                                                                                                                                                                                                                                                                                                                                                                                                                                                                                                                                                                                                                                                                                                                          |     |       |     |                        |      |             |     |       |     |       |      |                 |     |            |                                                                                                                                                                                                                                                                                                                                                                                                                                                                                                                                                   |      |             |      |       |               |            |               |       |               |       |                 |       |                |       |                |       |               |       |             |        |              |        |               |       |               |        |                    |      |                      |  |                          |  |
| 1                                                                                                                                                                                                                                                                                                                                                                                                                                                                                                                                       |            |                             |  |      |         |         |       |         |       |         |                                                                                                                                                                                                                                                                                                                                                                                                                                                                                                                                                                                                                                                                                                                                                                                                                                                                                                                                                                                                                                                                                                                                                                          |     |       |     |                        |      |             |     |       |     |       |      |                 |     |            |                                                                                                                                                                                                                                                                                                                                                                                                                                                                                                                                                   |      |             |      |       |               |            |               |       |               |       |                 |       |                |       |                |       |               |       |             |        |              |        |               |       |               |        |                    |      |                      |  |                          |  |
| Database Record                                                                                                                                                                                                                                                                                                                                                                                                                                                                                                                         | 52         |                             |  |      |         |         |       |         |       |         |                                                                                                                                                                                                                                                                                                                                                                                                                                                                                                                                                                                                                                                                                                                                                                                                                                                                                                                                                                                                                                                                                                                                                                          |     |       |     |                        |      |             |     |       |     |       |      |                 |     |            |                                                                                                                                                                                                                                                                                                                                                                                                                                                                                                                                                   |      |             |      |       |               |            |               |       |               |       |                 |       |                |       |                |       |               |       |             |        |              |        |               |       |               |        |                    |      |                      |  |                          |  |
| Run Number                                                                                                                                                                                                                                                                                                                                                                                                                                                                                                                              | 1 of 1     |                             |  |      |         |         |       |         |       |         |                                                                                                                                                                                                                                                                                                                                                                                                                                                                                                                                                                                                                                                                                                                                                                                                                                                                                                                                                                                                                                                                                                                                                                          |     |       |     |                        |      |             |     |       |     |       |      |                 |     |            |                                                                                                                                                                                                                                                                                                                                                                                                                                                                                                                                                   |      |             |      |       |               |            |               |       |               |       |                 |       |                |       |                |       |               |       |             |        |              |        |               |       |               |        |                    |      |                      |  |                          |  |
| Date                                                                                                                                                                                                                                                                                                                                                                                                                                                                                                                                    | 05-07-2019 |                             |  |      |         |         |       |         |       |         |                                                                                                                                                                                                                                                                                                                                                                                                                                                                                                                                                                                                                                                                                                                                                                                                                                                                                                                                                                                                                                                                                                                                                                          |     |       |     |                        |      |             |     |       |     |       |      |                 |     |            |                                                                                                                                                                                                                                                                                                                                                                                                                                                                                                                                                   |      |             |      |       |               |            |               |       |               |       |                 |       |                |       |                |       |               |       |             |        |              |        |               |       |               |        |                    |      |                      |  |                          |  |
| Time                                                                                                                                                                                                                                                                                                                                                                                                                                                                                                                                    | 10:11      |                             |  |      |         |         |       |         |       |         |                                                                                                                                                                                                                                                                                                                                                                                                                                                                                                                                                                                                                                                                                                                                                                                                                                                                                                                                                                                                                                                                                                                                                                          |     |       |     |                        |      |             |     |       |     |       |      |                 |     |            |                                                                                                                                                                                                                                                                                                                                                                                                                                                                                                                                                   |      |             |      |       |               |            |               |       |               |       |                 |       |                |       |                |       |               |       |             |        |              |        |               |       |               |        |                    |      |                      |  |                          |  |
| Acquired Date                                                                                                                                                                                                                                                                                                                                                                                                                                                                                                                           | 05-07-2019 |                             |  |      |         |         |       |         |       |         |                                                                                                                                                                                                                                                                                                                                                                                                                                                                                                                                                                                                                                                                                                                                                                                                                                                                                                                                                                                                                                                                                                                                                                          |     |       |     |                        |      |             |     |       |     |       |      |                 |     |            |                                                                                                                                                                                                                                                                                                                                                                                                                                                                                                                                                   |      |             |      |       |               |            |               |       |               |       |                 |       |                |       |                |       |               |       |             |        |              |        |               |       |               |        |                    |      |                      |  |                          |  |
| Acquired Time                                                                                                                                                                                                                                                                                                                                                                                                                                                                                                                           | 10:11      |                             |  |      |         |         |       |         |       |         |                                                                                                                                                                                                                                                                                                                                                                                                                                                                                                                                                                                                                                                                                                                                                                                                                                                                                                                                                                                                                                                                                                                                                                          |     |       |     |                        |      |             |     |       |     |       |      |                 |     |            |                                                                                                                                                                                                                                                                                                                                                                                                                                                                                                                                                   |      |             |      |       |               |            |               |       |               |       |                 |       |                |       |                |       |               |       |             |        |              |        |               |       |               |        |                    |      |                      |  |                          |  |
| Serial Number                                                                                                                                                                                                                                                                                                                                                                                                                                                                                                                           | W3231      |                             |  |      |         |         |       |         |       |         |                                                                                                                                                                                                                                                                                                                                                                                                                                                                                                                                                                                                                                                                                                                                                                                                                                                                                                                                                                                                                                                                                                                                                                          |     |       |     |                        |      |             |     |       |     |       |      |                 |     |            |                                                                                                                                                                                                                                                                                                                                                                                                                                                                                                                                                   |      |             |      |       |               |            |               |       |               |       |                 |       |                |       |                |       |               |       |             |        |              |        |               |       |               |        |                    |      |                      |  |                          |  |
| Calculated Data                                                                                                                                                                                                                                                                                                                                                                                                                                                                                                                         |            |                             |  |      |         |         |       |         |       |         |                                                                                                                                                                                                                                                                                                                                                                                                                                                                                                                                                                                                                                                                                                                                                                                                                                                                                                                                                                                                                                                                                                                                                                          |     |       |     |                        |      |             |     |       |     |       |      |                 |     |            |                                                                                                                                                                                                                                                                                                                                                                                                                                                                                                                                                   |      |             |      |       |               |            |               |       |               |       |                 |       |                |       |                |       |               |       |             |        |              |        |               |       |               |        |                    |      |                      |  |                          |  |
| Above Residual                                                                                                                                                                                                                                                                                                                                                                                                                                                                                                                          | 0          |                             |  |      |         |         |       |         |       |         |                                                                                                                                                                                                                                                                                                                                                                                                                                                                                                                                                                                                                                                                                                                                                                                                                                                                                                                                                                                                                                                                                                                                                                          |     |       |     |                        |      |             |     |       |     |       |      |                 |     |            |                                                                                                                                                                                                                                                                                                                                                                                                                                                                                                                                                   |      |             |      |       |               |            |               |       |               |       |                 |       |                |       |                |       |               |       |             |        |              |        |               |       |               |        |                    |      |                      |  |                          |  |
| Below Residual                                                                                                                                                                                                                                                                                                                                                                                                                                                                                                                          | 0          |                             |  |      |         |         |       |         |       |         |                                                                                                                                                                                                                                                                                                                                                                                                                                                                                                                                                                                                                                                                                                                                                                                                                                                                                                                                                                                                                                                                                                                                                                          |     |       |     |                        |      |             |     |       |     |       |      |                 |     |            |                                                                                                                                                                                                                                                                                                                                                                                                                                                                                                                                                   |      |             |      |       |               |            |               |       |               |       |                 |       |                |       |                |       |               |       |             |        |              |        |               |       |               |        |                    |      |                      |  |                          |  |
| Loading Index                                                                                                                                                                                                                                                                                                                                                                                                                                                                                                                           | 0.846      |                             |  |      |         |         |       |         |       |         |                                                                                                                                                                                                                                                                                                                                                                                                                                                                                                                                                                                                                                                                                                                                                                                                                                                                                                                                                                                                                                                                                                                                                                          |     |       |     |                        |      |             |     |       |     |       |      |                 |     |            |                                                                                                                                                                                                                                                                                                                                                                                                                                                                                                                                                   |      |             |      |       |               |            |               |       |               |       |                 |       |                |       |                |       |               |       |             |        |              |        |               |       |               |        |                    |      |                      |  |                          |  |
| Conc. Index                                                                                                                                                                                                                                                                                                                                                                                                                                                                                                                             | 0.2701     |                             |  |      |         |         |       |         |       |         |                                                                                                                                                                                                                                                                                                                                                                                                                                                                                                                                                                                                                                                                                                                                                                                                                                                                                                                                                                                                                                                                                                                                                                          |     |       |     |                        |      |             |     |       |     |       |      |                 |     |            |                                                                                                                                                                                                                                                                                                                                                                                                                                                                                                                                                   |      |             |      |       |               |            |               |       |               |       |                 |       |                |       |                |       |               |       |             |        |              |        |               |       |               |        |                    |      |                      |  |                          |  |
| RMS Residual                                                                                                                                                                                                                                                                                                                                                                                                                                                                                                                            | 0.033%     |                             |  |      |         |         |       |         |       |         |                                                                                                                                                                                                                                                                                                                                                                                                                                                                                                                                                                                                                                                                                                                                                                                                                                                                                                                                                                                                                                                                                                                                                                          |     |       |     |                        |      |             |     |       |     |       |      |                 |     |            |                                                                                                                                                                                                                                                                                                                                                                                                                                                                                                                                                   |      |             |      |       |               |            |               |       |               |       |                 |       |                |       |                |       |               |       |             |        |              |        |               |       |               |        |                    |      |                      |  |                          |  |
| Cell Temp (C)                                                                                                                                                                                                                                                                                                                                                                                                                                                                                                                           | 28.97      |                             |  |      |         |         |       |         |       |         |                                                                                                                                                                                                                                                                                                                                                                                                                                                                                                                                                                                                                                                                                                                                                                                                                                                                                                                                                                                                                                                                                                                                                                          |     |       |     |                        |      |             |     |       |     |       |      |                 |     |            |                                                                                                                                                                                                                                                                                                                                                                                                                                                                                                                                                   |      |             |      |       |               |            |               |       |               |       |                 |       |                |       |                |       |               |       |             |        |              |        |               |       |               |        |                    |      |                      |  |                          |  |
| Viscosity(cp)                                                                                                                                                                                                                                                                                                                                                                                                                                                                                                                           | 0.5320     |                             |  |      |         |         |       |         |       |         |                                                                                                                                                                                                                                                                                                                                                                                                                                                                                                                                                                                                                                                                                                                                                                                                                                                                                                                                                                                                                                                                                                                                                                          |     |       |     |                        |      |             |     |       |     |       |      |                 |     |            |                                                                                                                                                                                                                                                                                                                                                                                                                                                                                                                                                   |      |             |      |       |               |            |               |       |               |       |                 |       |                |       |                |       |               |       |             |        |              |        |               |       |               |        |                    |      |                      |  |                          |  |
| Reflected Pwr (uW)                                                                                                                                                                                                                                                                                                                                                                                                                                                                                                                      | 1.02       |                             |  |      |         |         |       |         |       |         |                                                                                                                                                                                                                                                                                                                                                                                                                                                                                                                                                                                                                                                                                                                                                                                                                                                                                                                                                                                                                                                                                                                                                                          |     |       |     |                        |      |             |     |       |     |       |      |                 |     |            |                                                                                                                                                                                                                                                                                                                                                                                                                                                                                                                                                   |      |             |      |       |               |            |               |       |               |       |                 |       |                |       |                |       |               |       |             |        |              |        |               |       |               |        |                    |      |                      |  |                          |  |
| Recalculation Status                                                                                                                                                                                                                                                                                                                                                                                                                                                                                                                    |            |                             |  |      |         |         |       |         |       |         |                                                                                                                                                                                                                                                                                                                                                                                                                                                                                                                                                                                                                                                                                                                                                                                                                                                                                                                                                                                                                                                                                                                                                                          |     |       |     |                        |      |             |     |       |     |       |      |                 |     |            |                                                                                                                                                                                                                                                                                                                                                                                                                                                                                                                                                   |      |             |      |       |               |            |               |       |               |       |                 |       |                |       |                |       |               |       |             |        |              |        |               |       |               |        |                    |      |                      |  |                          |  |
| Live-Meas : : Original :                                                                                                                                                                                                                                                                                                                                                                                                                                                                                                                |            |                             |  |      |         |         |       |         |       |         |                                                                                                                                                                                                                                                                                                                                                                                                                                                                                                                                                                                                                                                                                                                                                                                                                                                                                                                                                                                                                                                                                                                                                                          |     |       |     |                        |      |             |     |       |     |       |      |                 |     |            |                                                                                                                                                                                                                                                                                                                                                                                                                                                                                                                                                   |      |             |      |       |               |            |               |       |               |       |                 |       |                |       |                |       |               |       |             |        |              |        |               |       |               |        |                    |      |                      |  |                          |  |

(b) CsPbBr<sub>3</sub>-La<sup>3+</sup> perovskite QDs

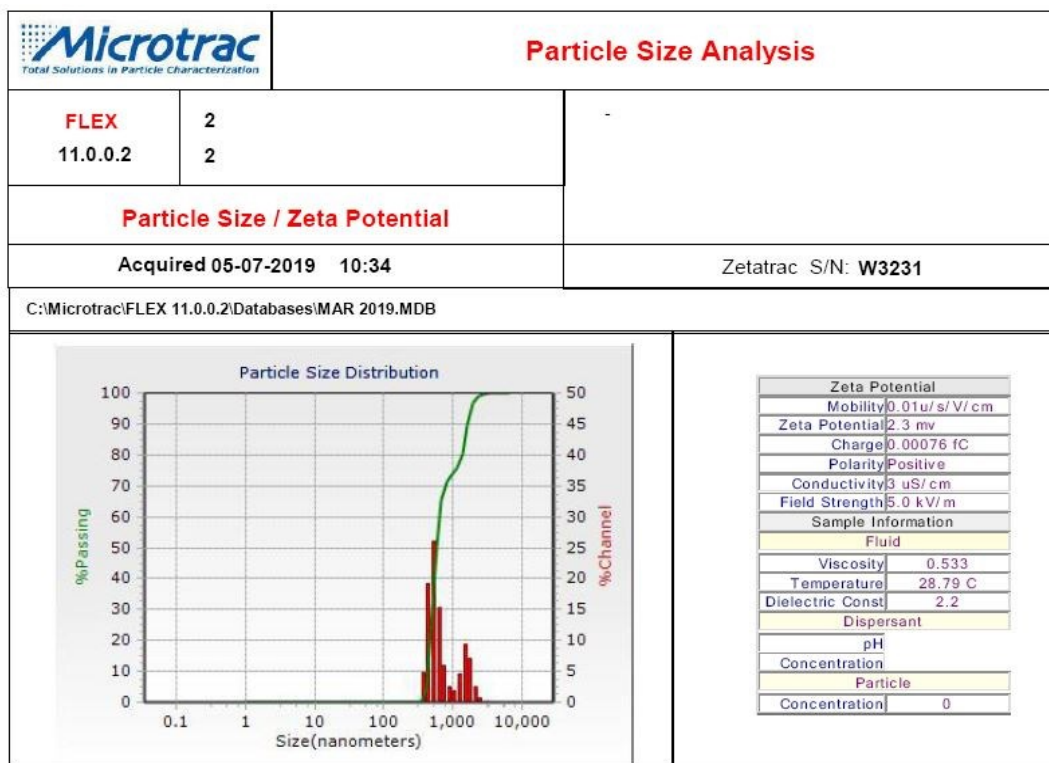

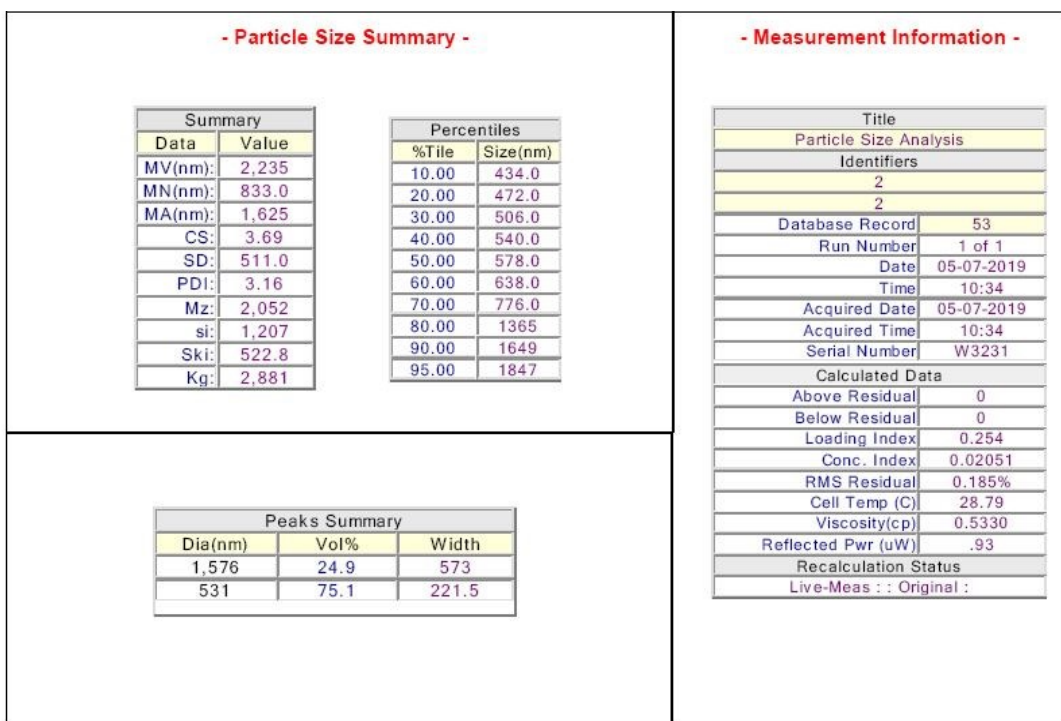

Fig. S6 DLS and Zeta potential values of CsPbBr<sub>3</sub> perovskite QDs and CsPbBr<sub>3</sub>-La<sup>3+</sup> perovskite QDs

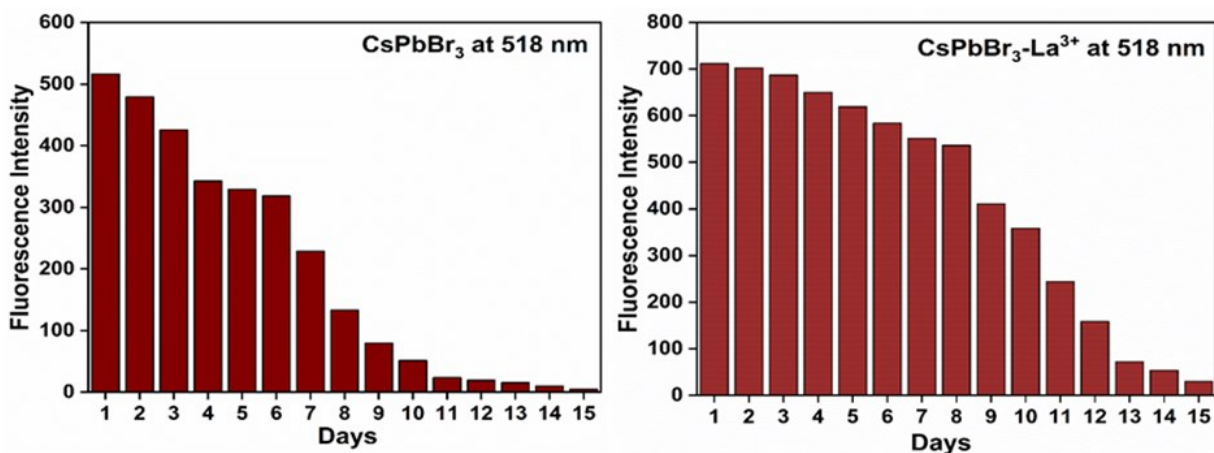

Fig. S7 Stability measurement by tracking changes in PL intensity

## References

1. Liu, Y., Tang, X., Zhu, T., Deng, M., Ikechukwu, I. P., Huang, W., ... Qiu, F. (2018). All-inorganic CsPbBr<sub>3</sub> perovskite quantum dots as a photoluminescent probe for ultrasensitive Cu<sup>2+</sup> detection. *Journal of Materials Chemistry C*, 6(17), 4793–4799. doi:10.1039/c8tc00249e.
